Celebrating Our 25<sup>th</sup> Annual Meeting!

# American Neuropsychiatric Association

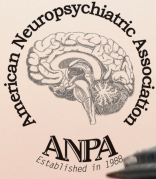

Sheraton Seattle Hotel  
February 15-18, 2014

## Seattle Washington USA

For more information contact the American Neuropsychiatric Association office:  
700 Ackerman Road, Suite 625 • Columbus, Ohio USA 43202 • Phone: 614-447-2077 • E-mail: [anpa@osu.edu](mailto:anpa@osu.edu)

# 25<sup>th</sup> Annual Meeting

## **THEME: Molecular Mechanisms in Neuropsychiatry**

### PRE-MEETING WORKSHOPS

#### ***ANPA Pre-Meeting Workshop: Functional Neuroimaging: A Review of Current and Future Clinical Techniques***

Robin A. Hurley, MD, Stephen R. Dager, MD,  
Shane C. Masters, MD, PhD

#### ***Society for Behavioral and Cognitive Neurology Workshop: Frontotemporal Dementia***

Daniel I. Kaufer, MD, Mario F. Mendez, MD, PhD,  
Donald Eknoyan, MD

### ANPA ANNUAL MEETING PROGRAM

#### **CNPA-PETER BASSOE LECTURE**

#### ***Primary Progressive Aphasia and the Language Network*** M-Marsel Mesulam, MD

#### **ANPA PRESIDENT'S SYMPOSIUM**

#### ***Virtual Reality and Emerging Technologies in Neuropsychiatric Rehabilitation***

Sheldon Benjamin, MD, Albert "Skip" Rizzo, PhD,  
Sofia Vinogradov, MD

#### **ANPA COMMITTEE ON RESEARCH REPORT**

#### ***Mild Cognitive Impairment***

Shirlene Sampson, MD, Yonas E. Geda, MD

### MOLECULAR MECHANISMS IN NEUROPSYCHIATRY SYMPOSIUM I

#### ***ANPA Movement Disorders SIG: Movement Dysfunctions in Complex Neuropsychiatric Disorders***

W. L. Alan Fung, MD, ScD, Shawn F. Smyth, MD, Nancy J. Butcher, MSc

#### ***ANPA Pediatric Neuropsychiatry SIG: The Many Neuropsychiatric Faces of Pediatric Autoimmune Encephalitis***

Scott Carroll, MD, Sue B. Turkel, MD, Jay A. Salpekar, MD

### CLINICAL AND RESEARCH PLATFORM PRESENTATIONS

Sheldon Benjamin, MD, Jeremy Schmahmann, MD

### POSTER SESSION I AND II

Hosted by Program Committee

### MOLECULAR MECHANISMS IN NEUROPSYCHIATRY SYMPOSIUM II

#### ***Genetic and Molecular Underpinnings of Frontotemporal Lobar Degeneration and Related Neurodegenerative Disorders***

Bruce L. Miller, MD, Lea T. Grinberg, MD, PhD, Zachary A. Miller, MD

#### ***Molecular Mechanisms in Neuropsychiatry Symposium III***

#### ***Molecular Mechanisms of Emerging Neurotherapeutics***

David B. Arciniegas, MD, C. Alan Anderson, MD, Adam L. Boxer, MD, PhD

Meeting information can be found on the ANPA web site:

**[www.anpaonline.org](http://www.anpaonline.org)**

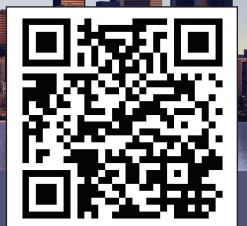

Pre-order today  
and save up to  
\$200\*\*

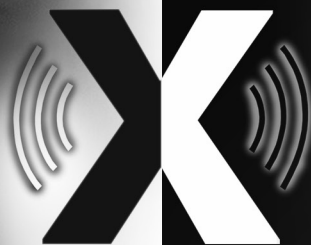

Performance You Can See & Hear

Exclusively from  MHS

# CONNERS CPT 3™

Conners Continuous  
Performance Test 3™

[MHS.com/CPT3](http://MHS.com/CPT3)

Coming  
Soon!

# CONNERS CATA™

Conners Continuous  
Auditory Test of Attention™

[MHS.com/CATA](http://MHS.com/CATA)

Coming  
Soon!

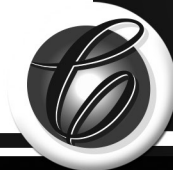

Evaluate attention disorders and neurological functioning with the Conners Continuous Performance Tests, now with both visual and auditory attention tests.

- A comprehensive evaluation with the introduction of an auditory attention test
- Easy interpretation with new reports offering clear visuals & summaries
- Trusted results with the most representative CPT normative samples collected
- Diagnostic confidence with a refined measurement of attention & new scores

\* Pre-order any Conners CPT Combo Kit and quote promo code CPAD1 to save \$100

\*\* Previous CPT customers, quote promo code CPAD2 to receive the \$100 pre-order offer AND an additional \$100 off all Conners CPT Combo Kits (Proof of purchase is required)

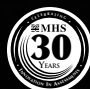

 **MHS**  
ASSESSMENTS

**Multi-Health Systems Inc.**

USA Tel: 1.800.456.3003 / CAN Tel: 1.800.268.6011  
[mhs.com](http://mhs.com) • [customerservice@mhs.com](mailto:customerservice@mhs.com)
