# THE JOURNAL OF NEUROPSYCHIATRY and Clinical Neurosciences

The Official Journal of the American Neuropsychiatric Association

## In this issue:

- The Neurobiology of Placebo and Nocebo: How Expectations Influence Treatment Outcomes
- Neuropsychiatric Symptoms and Interleukin-6 Serum Levels in Acute Stroke
- Psychiatric Disorders in Children and Adolescents Six-to-Twelve Months After Mild Traumatic Brain Injury
- The Longitudinal Course of Post-Stroke Apathy Over Five Years
- Hippocampal Volume Reduction Correlates With Apathy in Traumatic Brain Injury, But Not Schizophrenia

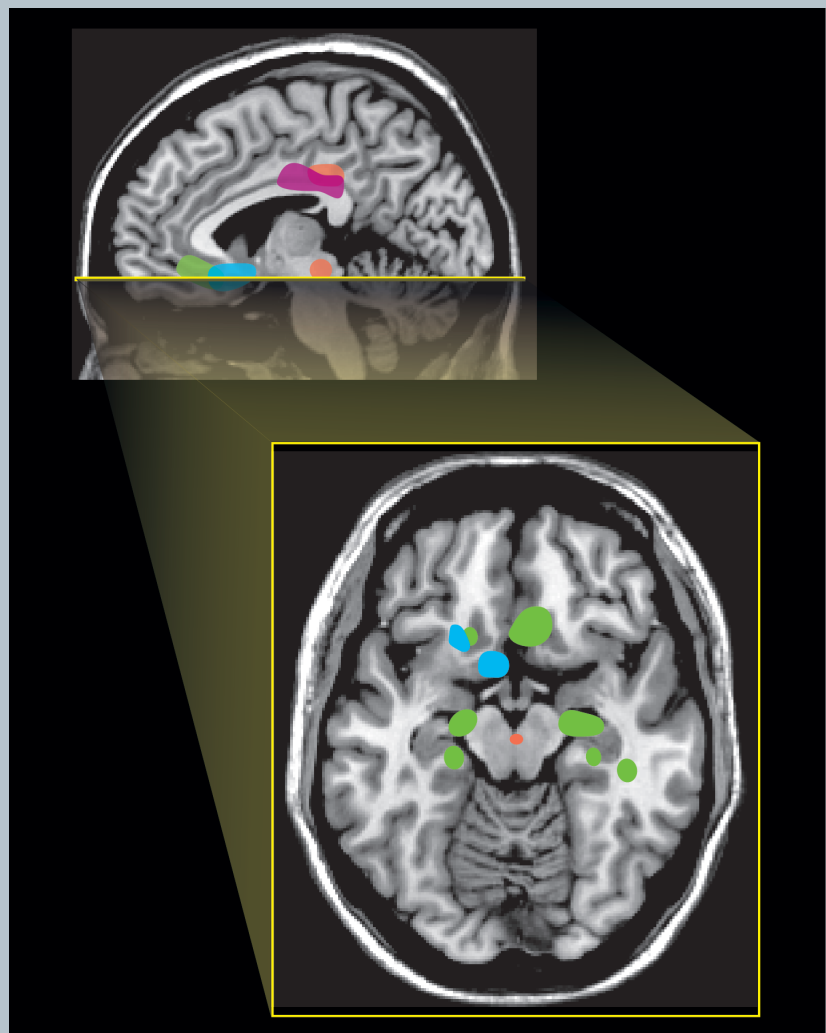

Source: https://psychiatryonline.org/doi/suppl/10.1176/jnp.2013.25.issue-4/suppl_file/cover.pdf
